# Supplementary material for: Electrospun Pd-doped mesoporous carbon nano fibres as catalysts for rechargeable Li–O2batteries
Source: Royal Society of Chemistry journal article supplement (doi:10.1039/c6ra09721a), 2016-01-01
Supplement: c6ra09721a1.pdf [file c6ra09721a1.pdf]

Electronic Supplementary Information

## Electrospun Pd-doped mesoporous Carbon Nano Fibres as catalysts for rechargeable Li-O<sub>2</sub> Batteries

S. Martinez Crespiera<sup>1</sup>, D. Amantia<sup>1</sup>, E. Knipping<sup>1</sup>, C. Aucher<sup>1</sup>, L. Aubouy<sup>1</sup>, J. Amici<sup>2</sup>, J. Zeng<sup>2</sup>,

C. Francia<sup>2</sup>, S. Bodoardo<sup>2</sup>.

<sup>1</sup>*Leitat Technological Center, Carrer de la Innovació, 2 08225 Terrassa, Spain.*

<sup>2</sup>*Department of Applied Science and Technology (DISAT), Politecnico di Torino, C.so Duca degli  
Abruzzi 24, 10129 Torino, ITALY*

| Relative atomic<br>concentration (wt. %)* | Pd2.5 | Pd2.5A | Pd5  |
|-------------------------------------------|-------|--------|------|
| C                                         | 90.0  | 84.8   | 86.6 |
| O                                         | 6.7   | 9.0    | 7.8  |
| N                                         | 3.0   | 4.0    | 4.1  |
| Pd                                        | 0.4   | 0.3    | 1.4  |
| Si                                        | -     | 2.0    | -    |

\*Surface functional components obtained by XPS

Table. S1 Surface functional component obtained from the survey XPS spectra reported in Fig. 3, for samples Pd2.5, Pd2.5A, Pd5.

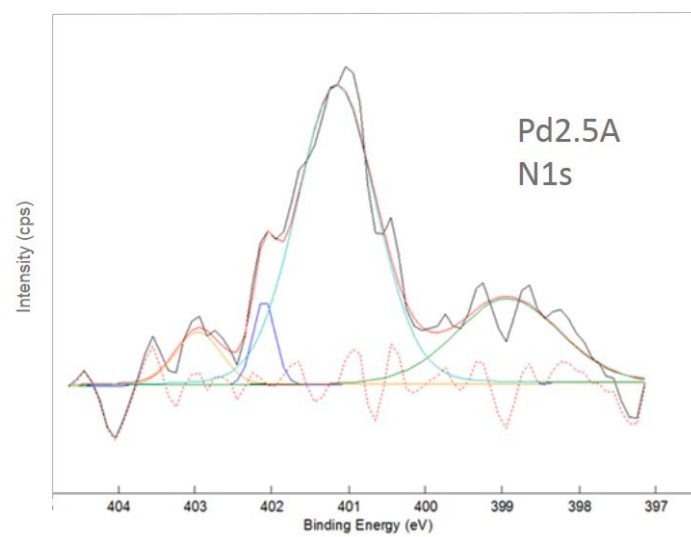

Fig. S1 De-convoluted N 1s spectra for sample Pd2.5A.

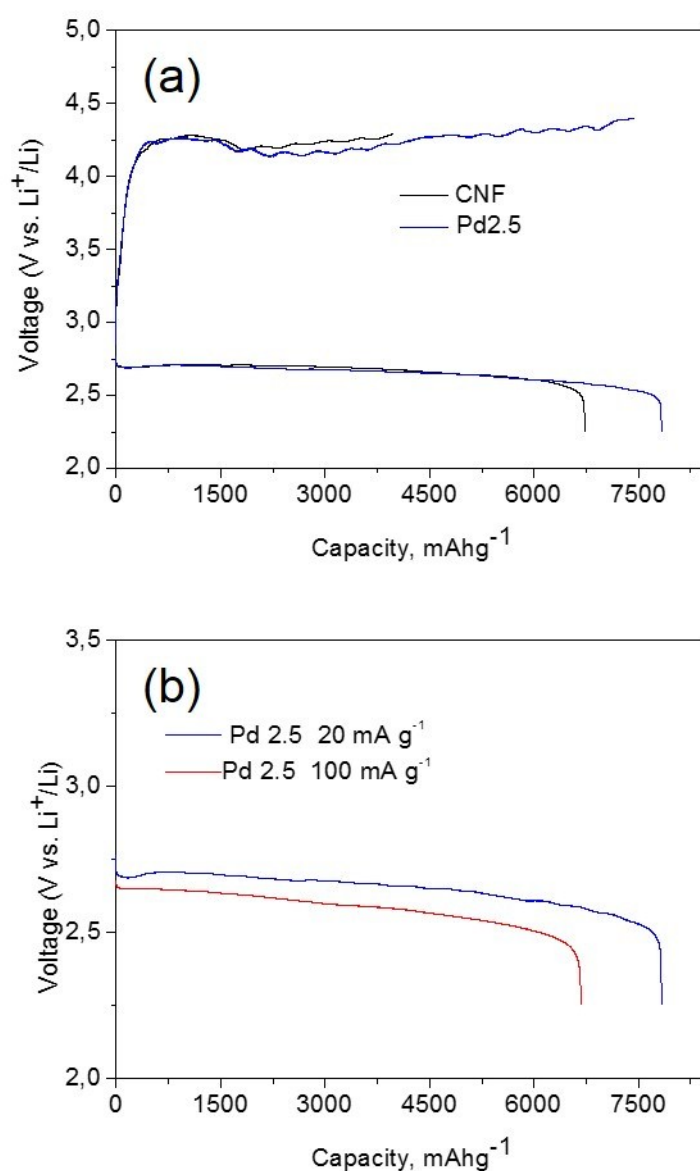

Fig. S2 Gravimetric capacity vs. cell voltage plots of the CNFs and Pd2.5 cathodes between OCV and 2.25V at a current density of 20 mA g<sup>-1</sup><sub>catalyst</sub> in TEGDME-based electrolyte: (a) full discharge and recharge to 4.4 V vs. Li<sup>+</sup>/Li; (b) discharge plots at two different applied currents (20 mA g<sup>-1</sup><sub>catalyst</sub> and 100 mA g<sup>-1</sup><sub>catalyst</sub>) for Pd2.5 cathodes.

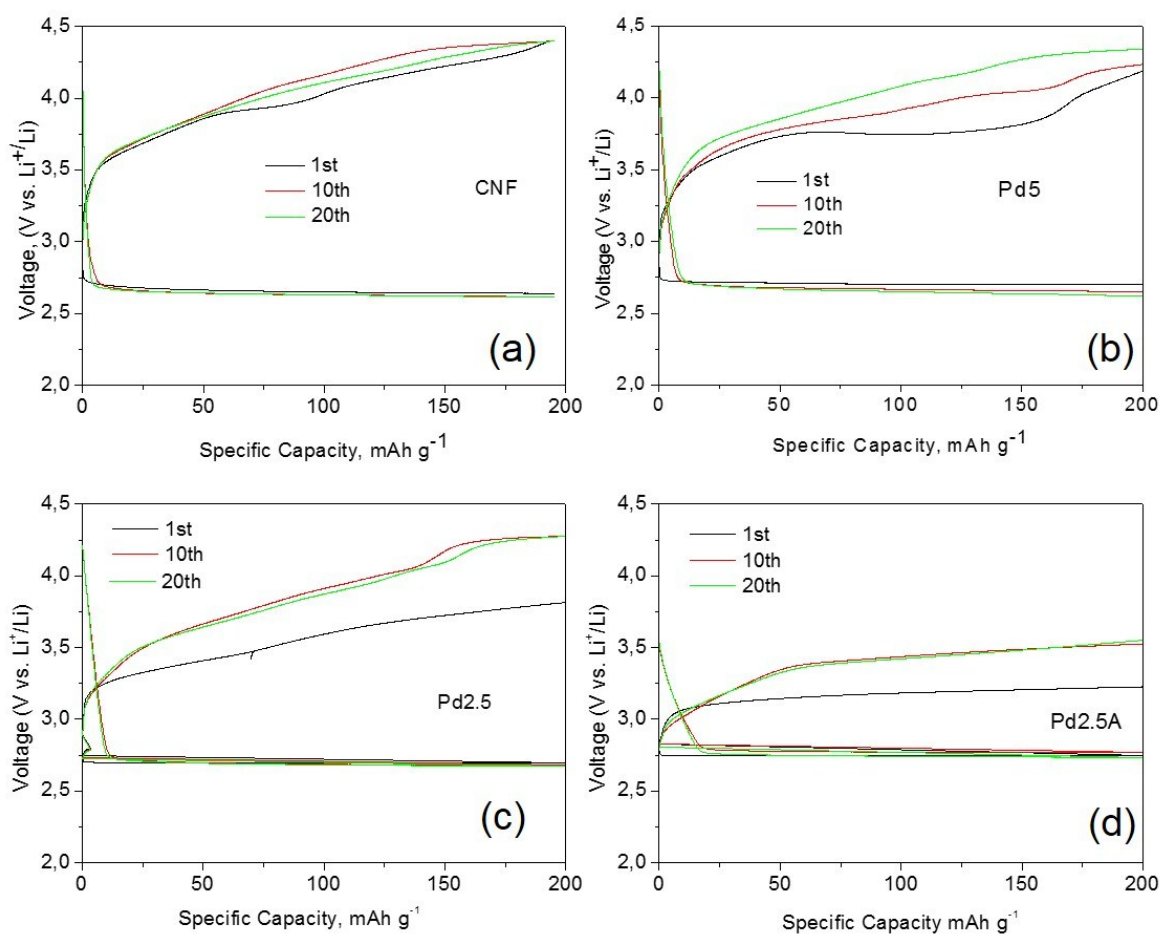

Fig. S3 Cell voltage profiles vs. capacity of the first 20 cycles of  $\text{Li-O}_2$  cells in TEGDME-based electrolyte with: (a) CNF-based cathode; (b) Pd5-based cathode; (c) Pd2.5-based cathode and (d) Pd2.5A-based cathode. Limited discharge capacity:  $200 \text{ mAh g}^{-1}$ . Current rate:  $20 \text{ mA g}^{-1}$ . Complete cell cycling are reported in Fig. 9.
